# Supplementary material
Source: PubMed Central journal article supplement (PMC3182480)
Supplement: NIHMS312980-supplement-02.pdf [file NIHMS312980-supplement-02.pdf]

# Supplemental Figure

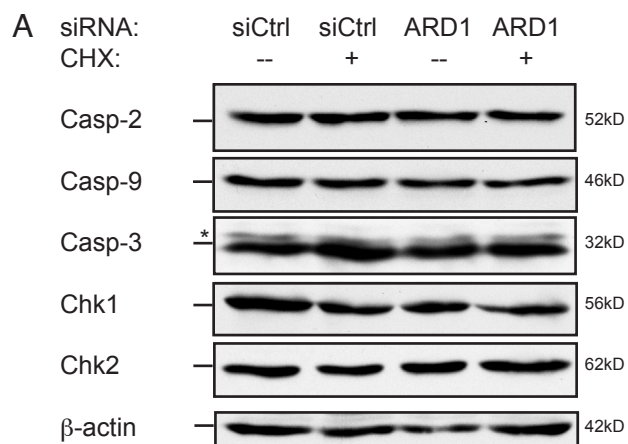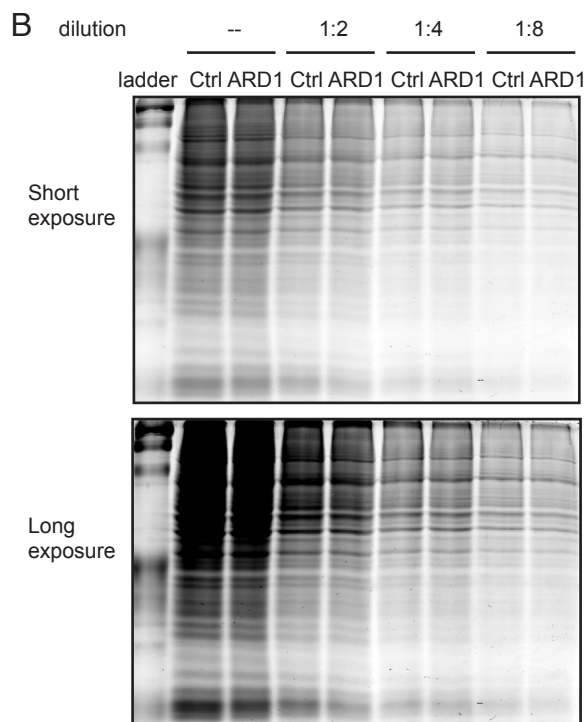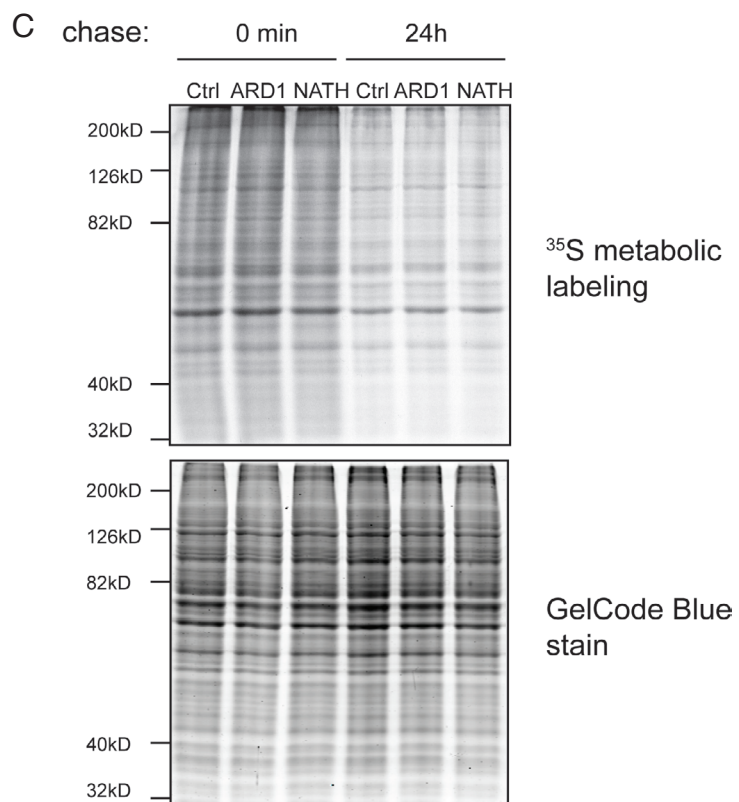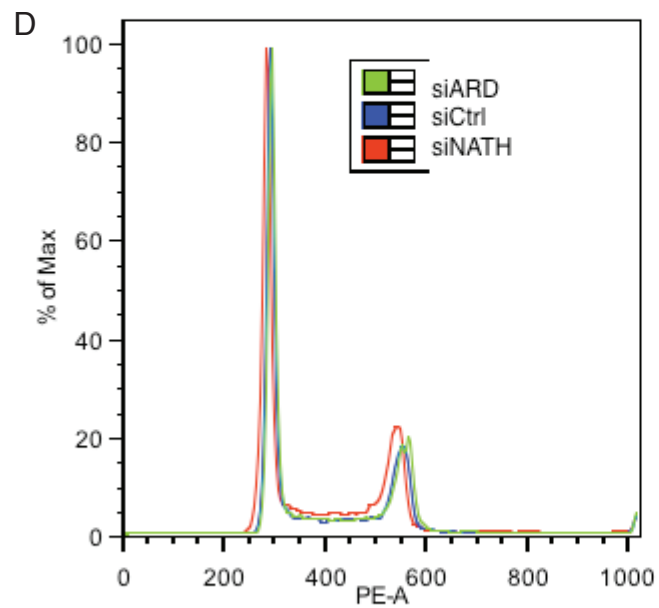

# Supplemental Figure A

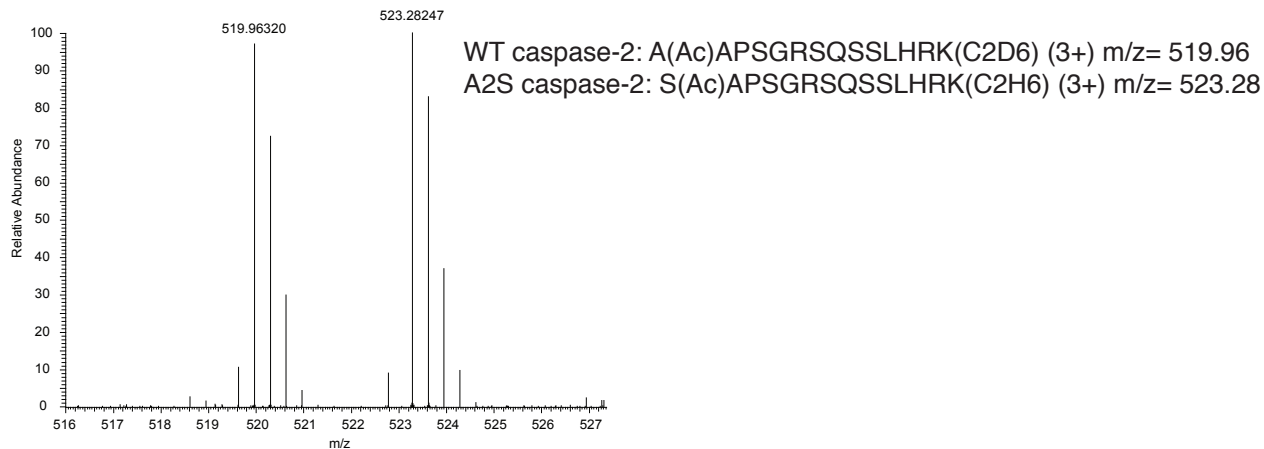

B

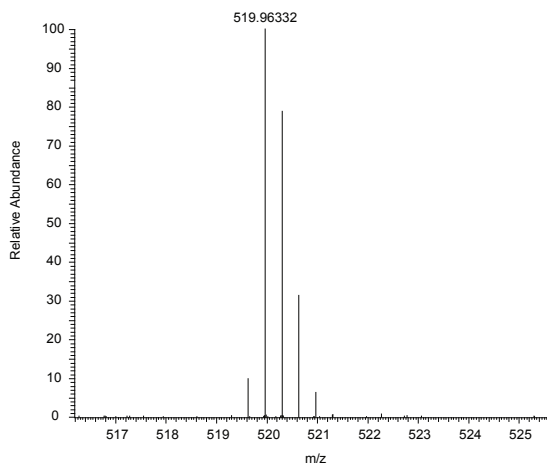

WT caspase-2: A(Ac)APSGRSQSSLHRK(C2D6) (3+)  
m/z= 519.96

C

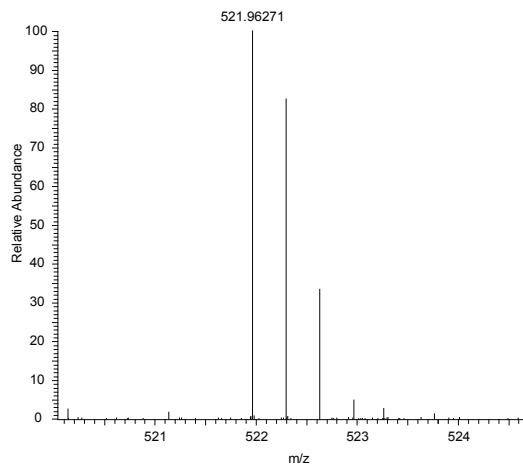

A3P caspase-2: (C2H6)PPSGRSQSSLHRK(C2H6) (3+)  
m/z= 521.96

D

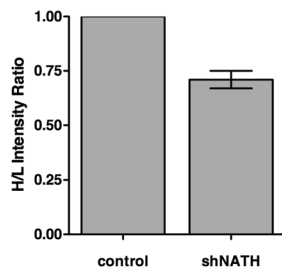

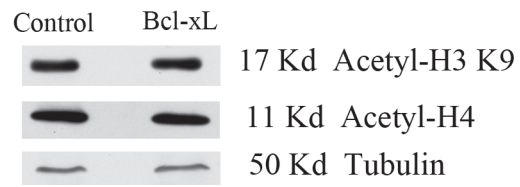

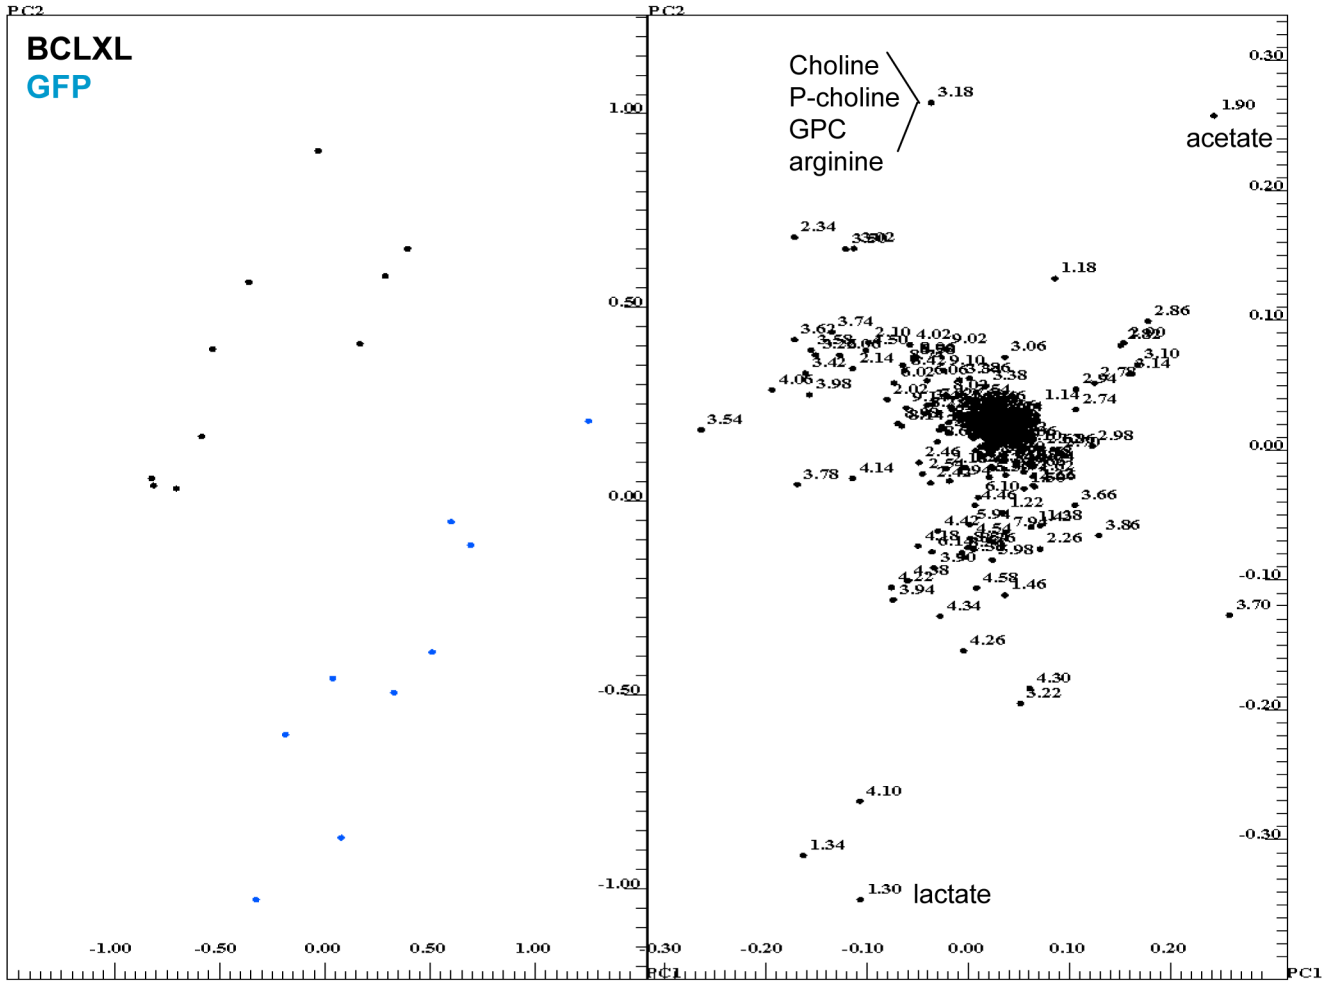

# Cell Conflict of Interest Form

Cell Press, 600 Technology Square, 5th floor, Cambridge, MA 02139

**Please complete this form electronically and upload the file with your final submission.**

Cell requires all authors to disclose any financial interest that might be construed to influence the results or interpretation of their manuscript.

As a guideline, any affiliation associated with a payment or financial benefit exceeding \$10,000 p.a. or 5% ownership of a company or research funding by a company with related interests would constitute a financial interest that must be declared. This policy applies to all submitted research manuscripts and review material.

Examples of statement language include: AUTHOR is an employee and shareholder of COMPANY; AUTHOR is a founder of COMPANY and a member of its scientific advisory board. This work was supported in part by a grant from COMPANY.

Please disclose any such interest below on behalf of all authors of this manuscript.

---

## Please check one of the following:

- None of the authors of this manuscript have a financial interest related to this work.
- Please print the following Disclosure Statement in the Acknowledgments section:

## Please provide the following information:

- Please check this box to indicate that you have asked every author of this work to declare any conflicts of interest. Your answers on this form are on behalf of every author of this work.

Manuscript #: CELL-D-10-00385

Article Title: Metabolic Regulation of Protein N-alpha-acetylation by Bcl-xL Promotes Cell Survival

Author List: Caroline H. Yi 1, Heling Pan 1\*, Jan Seebacher 1\*, Il-Ho Jang 6\*, Sven G. Hyberts 2, Gregory J. Heffron 2, Matthew G. Vander Heiden 8,3, Renliang Yang 4, Fupeng Li 4, Jason W. Locasale 3, Hadar Sharfi 3, Bo Zhai 1, Ricard Rodriguez-Mias 2, Harry Luithardt 5, Lewis C. Cantley 3,7, George Q. Daley 6, John M. Asara 7, Steven P. Gygi 1, Gerhard Wagner 2, Chuan-Fa Liu 4, Junying Yuan 1, #

Your Name: Junying Yuan

Date: 06/20/11
